# Supplementary material for: Anti-tumour activity of everolimus and sunitinib in neuroendocrine neoplasms
Source: PubMed Central journal article supplement — Endocr Connect. 2019 Apr 24;8(6):641–53. doi: 10.1530/EC-19-0134 (PMC6528409; doi:10.1530/ec-19-0134), 2019-04-24
Supplement: supplementary_figure_1.pdf [file supplementary_figure_1.pdf]

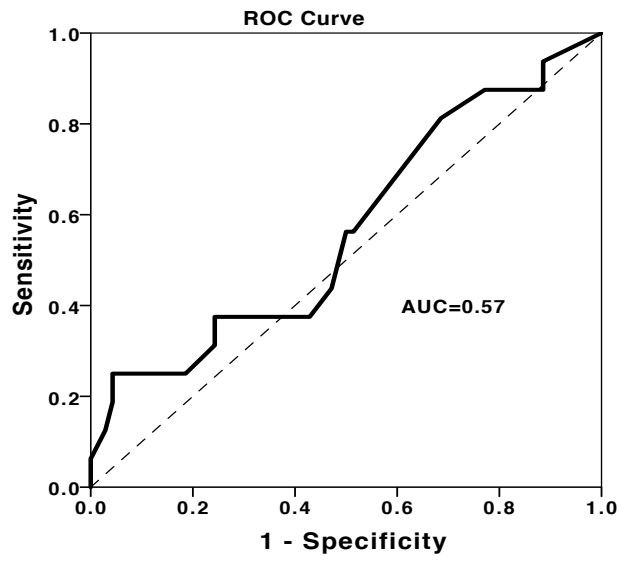

Supplementary Figure 1. ROC analysis of Ki-67 with regards to identifying non-responders (Progressive Disease as best recorded response according to RECIST) to first line MTT.
