# Supplementary material for: Anti-tumour activity of everolimus and sunitinib in neuroendocrine neoplasms
Source: PubMed Central journal article supplement — Endocr Connect. 2019 Apr 24;8(6):641–53. doi: 10.1530/EC-19-0134 (PMC6528409; doi:10.1530/ec-19-0134), 2019-04-24
Supplement: supplementary_table_1.pdf [file supplementary_table_1.pdf]

Supplementary Table 1. Disease control rates (DCR) recorded (partial response or stable disease) according to RECIST during second-line Molecular Targeted Therapy (MTT).

| Patient Characteristics (n=34)    |                                                                | DCR in Everolimus group | DCR in Sunitinib group | P-value |
|-----------------------------------|----------------------------------------------------------------|-------------------------|------------------------|---------|
|                                   |                                                                | 8/12                    | 17/22                  | 0.687   |
| <b>Gender</b>                     | Male                                                           | 5/8                     | 10/14                  | 0.883   |
|                                   | Female                                                         | 3/4                     | 7/8                    | 0.687   |
| <b>Age mean (SD)</b>              |                                                                | 59 ( 18)                | 61 ( 15)               | 0.787   |
| <b>Inheritance</b>                | Sporadic                                                       | 6/10                    | 15/20                  | 0.768   |
|                                   | Familial (MEN1)                                                | 2/2                     | 2/2                    | -       |
| <b>Primary Tumour Site</b>        | Pancreas                                                       | 7/10                    | 13/17                  | 0.782   |
|                                   | Small Intestinal                                               | 1/2                     | 1/2                    | 0.999   |
|                                   | Lung/Thymus                                                    | -                       | 2/2                    | -       |
|                                   | Unknown Primary                                                | -                       | 1/1                    | -       |
| <b>Liver Tumour Load</b>          | No liver metastases                                            | -                       | 1/1                    | -       |
|                                   | <5 unilobar liver metastases                                   | 1/1                     | 6/7                    | 0.999   |
|                                   | 5-10 unilobar liver metastases and/or bilobar liver metastases | 1/1                     | -                      | -       |
|                                   | >10 liver metastases or diffuse liver metastases               | 6/10                    | 10/14                  | 0.811   |
| <b>Ki67 Group</b>                 | G1 (ki67 <3%)                                                  | 1/2                     | 2/2                    | 0.329   |
|                                   | G2 (ki67 3-20%)                                                | 7/10                    | 13/15                  | 0.508   |
|                                   | G3 (ki67 >20%)                                                 |                         |                        |         |
| <b>Secretory status</b>           | Yes                                                            | 2/3                     | 5/7                    | 0.788   |
|                                   | No                                                             | 6/9                     | 12/15                  | 0.766   |
| <b>Prior Surgery</b>              | Yes                                                            | 7/10                    | 10/12                  | 0.506   |
|                                   | No                                                             | 1/2                     | 7/10                   | 0.598   |
| <b>SRS or Ga68-PET</b>            | Positive                                                       | 7/10                    | 14/19                  | -       |
|                                   | Negative                                                       | 1/1                     | --                     | 0.862   |
|                                   | Unknown                                                        | 0/1                     | 3/3                    | -       |
| <b>FDG-PET</b>                    | FDG-PET positive                                               | 1/1                     | 1/1                    | 0.400   |
|                                   | FDG-PET negative                                               | 0/3                     | 1/3                    | 0.643   |
|                                   | Unknown                                                        | 7/8                     | 13/18                  |         |
| <b>Previous treatment</b>         | SSA or naive                                                   | 4/6                     | 13/14                  | 0.673   |
|                                   | Pre-treated with chemotherapy                                  | 3/6                     | 6/8                    | -       |
| <b>Charlson Comorbidity Index</b> | 0                                                              | 5/9                     | 15/17                  | 0.332   |
|                                   | 1                                                              | 3/3                     | 2/4                    | 0.350   |
|                                   | 2                                                              | -                       | 1/1                    | -       |
|                                   | 3                                                              | -                       | -                      | -       |

DCR: Disease Control Rate; MTT: Molecular Targeted Therapy; SD: Standard Deviation; SRS: somatostatin receptor scintigraphy; Ga: Gallium; FDG-PET: fluoro-deoxyglucose positron emission tomography

Pearson chi-square test and Fisher's exact test as well as student's t-test were conducted as appropriate.
