# Supplementary material for: Anti-tumour activity of everolimus and sunitinib in neuroendocrine neoplasms
Source: PubMed Central journal article supplement — Endocr Connect. 2019 Apr 24;8(6):641–53. doi: 10.1530/EC-19-0134 (PMC6528409; doi:10.1530/ec-19-0134), 2019-04-24
Supplement: supplementary_table_3.pdf [file supplementary_table_3.pdf]

Supplementary Table 3. Disease control rates (DCR) recorded (partial response or stable disease) according to RECIST during second-line Molecular Targeted Therapy (MTT) in patients with PanNENs.

| Patient Characteristics (n=28)    |                                                                | DCR in Everolimus group | DCR in Sunitinib group | P-value |
|-----------------------------------|----------------------------------------------------------------|-------------------------|------------------------|---------|
|                                   |                                                                | N=11                    | N=17                   |         |
| <b>Gender</b>                     | Male                                                           | 5/8                     | 8/11                   | 0.636   |
|                                   | Female                                                         | 2/3                     | 5/6                    | 0.999   |
| <b>Age mean (SD)</b>              |                                                                | 54.9 (17.2)             | 59.2 (14.7)            | 0.490   |
| <b>Inheritance</b>                | Sporadic                                                       | 5/9                     | 11/15                  | 0.371   |
|                                   | Familial (MEN1)                                                | 2/2                     | 2/2                    | -       |
| <b>Liver Tumour Load</b>          | No liver metastases                                            | 1/1                     | -                      | -       |
|                                   | <5 unilobar liver metastases                                   | 1/1                     | 5/5                    | -       |
|                                   | 5-10 unilobar liver metastases and/or bilobar liver metastases | -                       | -                      | -       |
|                                   | >10 liver metastases or diffuse liver metastases               | 5/9                     | 8/12                   | 0.673   |
| <b>Ki67 Group</b>                 | G1 (ki67 <3%)                                                  | 1/2                     | 2/3                    | 0.999   |
|                                   | G2 (ki67 3-20%)                                                | 6/9                     | 9/12                   | 0.676   |
|                                   | G3 (ki67 >20%)                                                 | -                       | -                      | -       |
| <b>Secretory status</b>           | Yes                                                            | 1/2                     | 3/5                    | 0.999   |
|                                   | No                                                             | 6/9                     | 10/12                  | 0.375   |
| <b>Prior Surgery</b>              | Yes                                                            | 6/9                     | 7/9                    | 0.599   |
|                                   | No                                                             | 1/2                     | 6/8                    | 0.999   |
| <b>SRS or Ga68-PET</b>            | Positive                                                       | 6/9                     | 11/15                  | 0.728   |
|                                   | Negative                                                       | 1/1                     | 2/2                    | -       |
|                                   | Unknown                                                        | 0/1                     | -                      | -       |
| <b>FDG-PET</b>                    | FDG-PET positive                                               | 0/1                     | 1/1                    | -       |
|                                   | FDG-PET negative                                               | 1/3                     | 3/3                    | -       |
|                                   | Unknown                                                        | 6/7                     | 9/13                   | -       |
| <b>Previous treatment</b>         | SSA or naive                                                   | 3/4                     | 9/10                   | 0.505   |
|                                   | Pre-treated with chemotherapy                                  | 4/7                     | 4/7                    | 0.999   |
| <b>Charlson Comorbidity Index</b> | 0                                                              | 4/8                     | 10/12                  | 0.161   |
|                                   | 1                                                              | 3/3                     | 2/4                    | -       |
|                                   | 2                                                              | -                       | 1/1                    | -       |
|                                   | 3                                                              | -                       | -                      | -       |

DCR: Disease Control Rate; MTT: Molecular Targeted Therapy; SD: Standard Deviation; SRS: somatostatin receptor scintigraphy; Ga: Gallium; FDG-PET: fluoro-deoxyglucose positron emission tomography

Pearson chi-square test and Fisher's exact test as well as student's t-test were conducted as appropriate.
