# Supplementary material for: Anti-tumour activity of everolimus and sunitinib in neuroendocrine neoplasms
Source: PubMed Central journal article supplement — Endocr Connect. 2019 Apr 24;8(6):641–53. doi: 10.1530/EC-19-0134 (PMC6528409; doi:10.1530/ec-19-0134), 2019-04-24
Supplement: supplementary_table_4.pdf [file supplementary_table_4.pdf]

Supplementary Table 4. Multivariate Cox-regression model for progression-free survival (PFS) for patients with pancreatic neuroendocrine neoplasms (PanNENs) receiving first line molecular targeted therapy (MTT).

| Prognostic factor for PFS      | HR    | 95%CI     | P-value      |
|--------------------------------|-------|-----------|--------------|
| <b>MTT agent</b>               |       |           |              |
| Everolimus                     | 1     |           |              |
| Sunitinib                      | 4.9   | 1.8-13.9  | <b>0.002</b> |
| <b>Age at baseline</b>         | 0.98  | 0.95-1.01 | 0.247        |
| <b>Grade</b>                   |       |           |              |
| G1 (Ki67<3%)                   | 1     |           |              |
| G2 (Ki67 3-20%)                | 0.693 | 0.4-4     | 0.693        |
| G3 (Ki67 >20%)                 | 76.3  | 5-1171    | <b>0.002</b> |
| <b>SRS or Ga68-PET</b>         |       |           |              |
| Negative                       | 1     |           |              |
| Positive                       | 1.6   | 0.42-6.1  | 0.494        |
| Unknown                        | 0.3   | 0.04-2.35 | 0.252        |
| <b>Prior Resective Surgery</b> |       |           |              |
| No                             | 1     |           |              |
| Yes                            | 0.8   | 0.35-1.8  | 0.585        |
| <b>Prior Chemotherapy</b>      |       |           |              |
| No                             | 1     |           |              |
| Yes                            | 1.79  | 0.68-4.7  | 0.242        |

HR: hazard ratio, CI: confidence interval, G: grade; SRS: somatostatin receptor scintigraphy; Ga: gallium
